# Supplementary material
Source: ML conference proceedings conference paper supplement (https://openaccess.thecvf.com/content/CVPR2026/html/Shi_RT-Splatting_Joint_Reflection-Transmission_CVPR_2026_paper.html)
Supplement: Supplementary file 1 [file Shi_RT-Splatting_Joint_Reflection-Transmission_CVPR_2026_supplemental.pdf]

# RT-Splatting: Joint Reflection-Transmission Modeling with Gaussian Splatting

## Supplementary Material

In the supplementary material, we provide additional implementation details of our method (Sec. A). We also present an ablation study that examines the sensitivity of Specular-Aware Gradient Gating to the gating strength  $k$  (Sec. B). Finally, we report a per-scene breakdown of quantitative metrics and include further qualitative results (Sec. C).

### A. Implementation Details

We strictly follow the evaluation protocols established in 3DGS-DR [43] and Ref-GS [50]. Consistent with these methods, we adopt the spherical domain strategy to define the foreground region of interest. Furthermore, we adopt their data preprocessing standards by applying consistent image downsampling factors across all experiments to ensure a fair comparison. All experiments are conducted on a single NVIDIA RTX 4090 GPU.

#### A.1. Density Control Strategy

Our density control strategy adapts the standard 2DGS [14] scheme to align with our proposed occupancy-opacity factorization. While standard 2DGS relies on opacity resets to regulate the number of primitives and prevent floaters, our decoupled representation requires managing the Gaussian primitives based on both geometric occupancy and optical opacity. We therefore introduce an interleaved reset schedule: instead of the standard opacity reset every 3,000 iterations, we perform resets every 1,500 iterations, alternating between geometric occupancy  $\sigma$  and optical opacity  $\alpha$ . Furthermore, we perform pruning based on geometric occupancy  $\sigma$  rather than optical opacity  $\alpha$  to prevent the erroneous removal of semi-transparent structures.

#### A.2. Specular-Aware Gradient Gating

For the local variance calculation in Eq. (5), we use a  $3 \times 3$  window size. The hyperparameter  $k$  is set to 4 based on our sensitivity analysis in Sec. B. In practice, the gradient modulation described in Eq. (6) is implemented via a partial stop-gradient mechanism. Let  $\text{sg}(\cdot)$  denote the stop-gradient operator. The gated transmission color  $\tilde{\mathbf{C}}_{\text{trans}}$  used for final composition is defined as:

$$\tilde{\mathbf{C}}_{\text{trans}} = (1 - g) \cdot \text{sg}(\mathbf{C}_{\text{trans}}) + g \cdot \mathbf{C}_{\text{trans}}. \quad (8)$$

This formulation ensures  $\tilde{\mathbf{C}}_{\text{trans}} \equiv \mathbf{C}_{\text{trans}}$  during the forward pass, while scaling the backward gradients by  $g$ .

#### A.3. Losses

Following 2DGS [14], we minimize the normal consistency loss  $\mathcal{L}_n$  to enforce geometric alignment between rendered

Table 4. Sensitivity analysis of the gating strength hyperparameter  $k$ , averaged over transparent regions of all scenes.

| $k$ | PSNR $\uparrow$ | SSIM $\uparrow$ | LPIPS $\downarrow$ |
|-----|-----------------|-----------------|--------------------|
| 0   | 38.574          | 0.9861          | 0.0179             |
| 1   | 38.436          | 0.9860          | 0.0185             |
| 2   | 38.631          | 0.9862          | 0.0178             |
| 4   | <b>38.696</b>   | <b>0.9865</b>   | <b>0.0175</b>      |
| 8   | 38.608          | 0.9863          | 0.0176             |
| 16  | 38.523          | 0.9864          | 0.0179             |
| 32  | 38.417          | 0.9863          | 0.0180             |

normals and depth gradients. For appearance supervision  $\mathcal{L}_{\text{img}}$ , we augment the standard  $\mathcal{L}_1$  and D-SSIM [39] losses with the perceptual loss  $\mathcal{L}_{\text{perc}}$  from EnvGS [41], with  $\lambda = 0.2$  and  $\lambda_{\text{perc}} = 0.01$ :

$$\mathcal{L}_{\text{img}} = (1 - \lambda)\mathcal{L}_1 + \lambda\mathcal{L}_{\text{D-SSIM}} + \lambda_{\text{perc}}\mathcal{L}_{\text{perc}}. \quad (9)$$

Combining these with our transparent mask regularization  $\mathcal{L}_{\text{mask}}$  in Eq. (7), the total loss is given as:

$$\mathcal{L} = \mathcal{L}_{\text{img}} + \lambda_n\mathcal{L}_n + \lambda_{\text{mask}}\mathcal{L}_{\text{mask}}. \quad (10)$$

We empirically set  $\lambda_n = 0.05$  and  $\lambda_{\text{mask}} = 0.01$ .

### B. Additional Ablation Study

To evaluate the impact of our Specular-Aware Gradient Gating mechanism, we conduct a sensitivity analysis on the gating strength hyperparameter  $k$  defined in Eq. (5). The quantitative results, which are averaged over the transparent regions across all eight scenes, are summarized in Tab. 4. The performance peaks at  $k = 4$ , which offers the optimal trade-off between suppressing specular artifacts and preserving transmission details.

### C. Additional Results

Tables 5 and 6 report per-scene quantitative metrics for entire images and transparent regions, respectively. In addition, Fig. 6 presents further qualitative results to demonstrate the decomposition capabilities of our method. In contrast, baseline methods often fail to simultaneously reconstruct surface reflections and the transmission behind the surface, recovering only one component at the expense of the other. We also recommend viewing the supplementary video to best appreciate the temporal consistency and visual quality of our results.

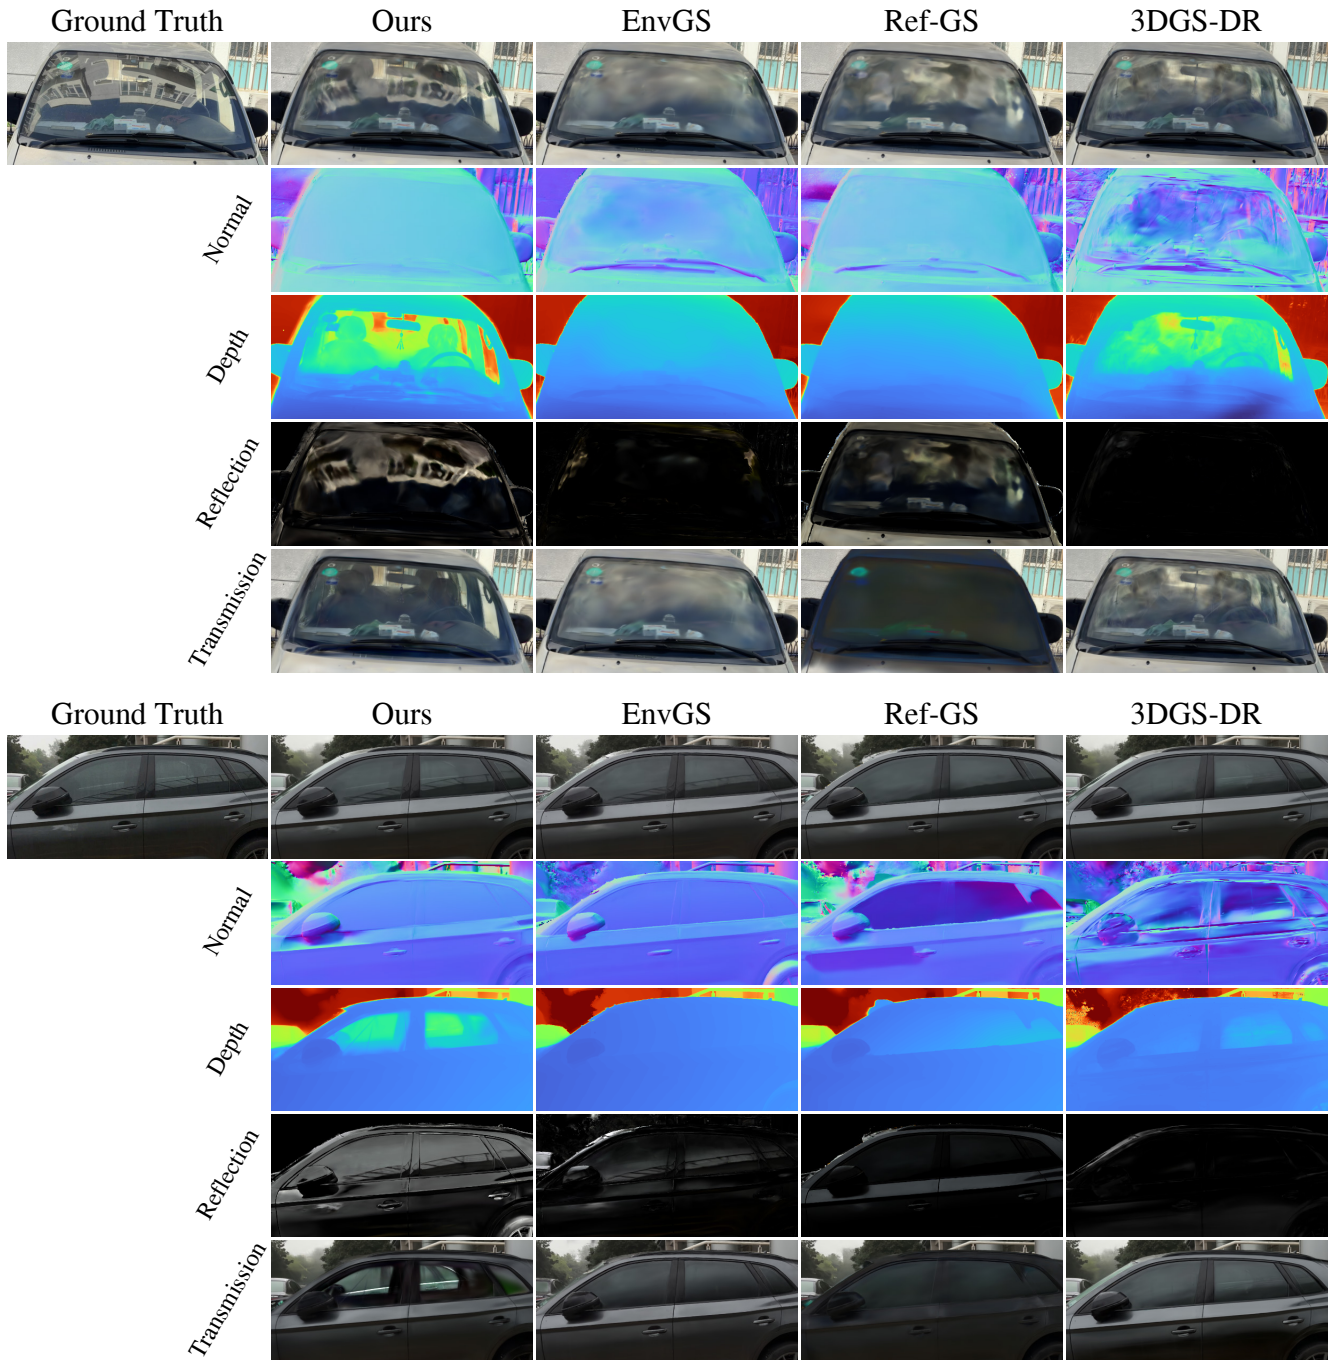

Figure 6. **Visual decomposition on real-world scenes.** We visualize the decomposed components of our method compared to baselines. For our method, *Normal* captures the surface geometry, while *Depth* corresponds to the volumetric accumulation. Since baseline methods do not explicitly model semi-transparent transmission, we visualize their diffuse component in the *Transmission* row. Our method achieves high-fidelity separation of the *Reflection* and *Transmission* layers.

| Methods      | PSNR $\uparrow$ |               |                |                  |             |              |            |             |
|--------------|-----------------|---------------|----------------|------------------|-------------|--------------|------------|-------------|
|              | <i>Sedan</i>    | <i>Toycar</i> | <i>Compact</i> | <i>Hatchback</i> | <i>Audi</i> | <i>Truck</i> | <i>Van</i> | <i>Swab</i> |
| 3DGS [18]    | 26.038          | 23.779        | 29.506         | 26.556           | 27.683      | 25.394       | 23.436     | 31.578      |
| 2DGS [14]    | 25.467          | 24.012        | 29.602         | 26.623           | 27.487      | 25.113       | 23.317     | 30.032      |
| GShader [17] | 25.709          | 23.888        | 28.542         | 25.880           | 26.913      | 23.738       | 22.189     | 20.077      |
| 3DGS-DR [43] | 26.117          | 24.123        | 29.232         | 27.088           | 27.778      | 25.246       | 23.385     | 28.882      |
| Ref-GS [50]  | 26.397          | 24.176        | 29.706         | 26.556           | 27.858      | 24.902       | 22.351     | 30.251      |
| EnvGS [41]   | 26.790          | 24.637        | 29.703         | 27.457           | 28.686      | 25.571       | 23.043     | 30.651      |
| Ours         | 27.071          | 24.794        | 30.598         | 27.619           | 29.011      | 25.848       | 23.744     | 33.817      |

  

| Methods      | SSIM $\uparrow$ |               |                |                  |             |              |            |             |
|--------------|-----------------|---------------|----------------|------------------|-------------|--------------|------------|-------------|
|              | <i>Sedan</i>    | <i>Toycar</i> | <i>Compact</i> | <i>Hatchback</i> | <i>Audi</i> | <i>Truck</i> | <i>Van</i> | <i>Swab</i> |
| 3DGS [18]    | 0.768           | 0.637         | 0.895          | 0.845            | 0.874       | 0.878        | 0.778      | 0.949       |
| 2DGS [14]    | 0.770           | 0.653         | 0.888          | 0.848            | 0.875       | 0.870        | 0.768      | 0.945       |
| GShader [17] | 0.760           | 0.649         | 0.885          | 0.840            | 0.860       | 0.844        | 0.747      | 0.855       |
| 3DGS-DR [43] | 0.768           | 0.655         | 0.883          | 0.846            | 0.869       | 0.873        | 0.773      | 0.943       |
| Ref-GS [50]  | 0.778           | 0.658         | 0.898          | 0.845            | 0.864       | 0.871        | 0.758      | 0.943       |
| EnvGS [41]   | 0.777           | 0.667         | 0.878          | 0.848            | 0.881       | 0.876        | 0.753      | 0.942       |
| Ours         | 0.790           | 0.684         | 0.893          | 0.851            | 0.887       | 0.881        | 0.785      | 0.958       |

  

| Methods      | LPIPS $\downarrow$ |               |                |                  |             |              |            |             |
|--------------|--------------------|---------------|----------------|------------------|-------------|--------------|------------|-------------|
|              | <i>Sedan</i>       | <i>Toycar</i> | <i>Compact</i> | <i>Hatchback</i> | <i>Audi</i> | <i>Truck</i> | <i>Van</i> | <i>Swab</i> |
| 3DGS [18]    | 0.205              | 0.237         | 0.147          | 0.196            | 0.150       | 0.148        | 0.233      | 0.193       |
| 2DGS [14]    | 0.234              | 0.238         | 0.175          | 0.198            | 0.164       | 0.174        | 0.266      | 0.219       |
| GShader [17] | 0.226              | 0.258         | 0.167          | 0.195            | 0.177       | 0.192        | 0.282      | 0.453       |
| 3DGS-DR [43] | 0.209              | 0.240         | 0.163          | 0.204            | 0.160       | 0.166        | 0.255      | 0.203       |
| Ref-GS [50]  | 0.205              | 0.236         | 0.149          | 0.196            | 0.183       | 0.156        | 0.263      | 0.217       |
| EnvGS [41]   | 0.207              | 0.233         | 0.167          | 0.183            | 0.139       | 0.163        | 0.267      | 0.253       |
| Ours         | 0.188              | 0.227         | 0.141          | 0.177            | 0.137       | 0.129        | 0.215      | 0.179       |

Table 5. **Per-scene metrics on entire images.** We report PSNR, SSIM, and LPIPS on scenes from Ref-Real [35], NeRF-Casting [36], EnvGS [41], T&T [21], and our self-captured scenes.

| Methods      | PSNR $\uparrow$ |               |                |                  |             |              |            |             |
|--------------|-----------------|---------------|----------------|------------------|-------------|--------------|------------|-------------|
|              | <i>Sedan</i>    | <i>Toycar</i> | <i>Compact</i> | <i>Hatchback</i> | <i>Audi</i> | <i>Truck</i> | <i>Van</i> | <i>Swab</i> |
| 3DGS [18]    | 35.514          | 40.462        | 37.212         | 37.543           | 38.742      | 36.567       | 30.652     | 34.481      |
| 2DGS [14]    | 35.315          | 40.379        | 37.276         | 36.555           | 37.932      | 36.541       | 30.720     | 33.126      |
| GShader [17] | 35.394          | 40.545        | 35.194         | 36.017           | 38.300      | 35.334       | 28.836     | 25.155      |
| 3DGS-DR [43] | 36.489          | 40.137        | 37.301         | 37.241           | 39.518      | 36.655       | 30.547     | 33.480      |
| Ref-GS [50]  | 37.037          | 40.338        | 37.212         | 37.543           | 38.540      | 35.894       | 29.711     | 33.581      |
| EnvGS [41]   | 36.729          | 40.638        | 36.777         | 37.609           | 39.475      | 36.492       | 29.917     | 33.535      |
| Ours         | 37.727          | 40.899        | 40.785         | 38.927           | 42.015      | 38.238       | 32.429     | 38.551      |

  

| Methods      | SSIM $\uparrow$ |               |                |                  |             |              |            |             |
|--------------|-----------------|---------------|----------------|------------------|-------------|--------------|------------|-------------|
|              | <i>Sedan</i>    | <i>Toycar</i> | <i>Compact</i> | <i>Hatchback</i> | <i>Audi</i> | <i>Truck</i> | <i>Van</i> | <i>Swab</i> |
| 3DGS [18]    | 0.984           | 0.995         | 0.988          | 0.991            | 0.990       | 0.991        | 0.949      | 0.979       |
| 2DGS [14]    | 0.985           | 0.995         | 0.988          | 0.991            | 0.989       | 0.991        | 0.951      | 0.978       |
| GShader [17] | 0.984           | 0.995         | 0.984          | 0.990            | 0.988       | 0.988        | 0.945      | 0.944       |
| 3DGS-DR [43] | 0.986           | 0.995         | 0.988          | 0.991            | 0.989       | 0.990        | 0.949      | 0.978       |
| Ref-GS [50]  | 0.987           | 0.994         | 0.988          | 0.991            | 0.988       | 0.989        | 0.947      | 0.976       |
| EnvGS [41]   | 0.986           | 0.995         | 0.987          | 0.991            | 0.990       | 0.989        | 0.949      | 0.977       |
| Ours         | 0.988           | 0.995         | 0.992          | 0.993            | 0.992       | 0.992        | 0.954      | 0.986       |

  

| Methods      | LPIPS $\downarrow$ |               |                |                  |             |              |            |             |
|--------------|--------------------|---------------|----------------|------------------|-------------|--------------|------------|-------------|
|              | <i>Sedan</i>       | <i>Toycar</i> | <i>Compact</i> | <i>Hatchback</i> | <i>Audi</i> | <i>Truck</i> | <i>Van</i> | <i>Swab</i> |
| 3DGS [18]    | 0.016              | 0.005         | 0.015          | 0.010            | 0.018       | 0.008        | 0.053      | 0.042       |
| 2DGS [14]    | 0.017              | 0.005         | 0.014          | 0.010            | 0.020       | 0.008        | 0.056      | 0.049       |
| GShader [17] | 0.017              | 0.006         | 0.019          | 0.011            | 0.020       | 0.010        | 0.061      | 0.107       |
| 3DGS-DR [43] | 0.015              | 0.005         | 0.015          | 0.010            | 0.019       | 0.009        | 0.054      | 0.044       |
| Ref-GS [50]  | 0.014              | 0.006         | 0.015          | 0.010            | 0.022       | 0.010        | 0.060      | 0.052       |
| EnvGS [41]   | 0.015              | 0.006         | 0.016          | 0.009            | 0.018       | 0.010        | 0.058      | 0.055       |
| Ours         | 0.012              | 0.005         | 0.010          | 0.008            | 0.015       | 0.007        | 0.049      | 0.034       |

Table 6. Per-scene metrics on transparent regions.
